# Supplementary material for: A subset of sweet-sensing neurons identified by IR56d are necessary and sufficient for fatty acid taste
Source: PubMed Central journal article supplement (PMC5697886; doi:10.1371/journal.pgen.1007059), 2017-11-09
Supplement: pgen.1007059.s001.pdf [file pgen.1007059.s001.pdf]

**A** 100mM Sucrose

| GAL4          | PER (%) | SE    | n  | normalized | p   |
|---------------|---------|-------|----|------------|-----|
| w1118 control | 100.00  | 0.00  | 35 | 1.00       | -   |
| Gr64a         | 93.33   | 6.67  | 10 | 0.93       | -   |
| Gr64c         | 100.00  | 0.00  | 15 | 1.00       | -   |
| Gr64d         | 97.22   | 2.78  | 12 | 0.97       | -   |
| Gr64e         | 20.00   | 9.09  | 15 | 0.20       | *** |
| Gr64f         | 5.69    | 1.98  | 41 | 0.06       | *** |
| Gr5a          | 79.05   | 5.65  | 35 | 0.79       | -   |
| Gr61a         | 26.19   | 10.59 | 14 | 0.26       | *** |
| Gr43a         | 95.37   | 3.01  | 36 | 0.95       | -   |
| Ir56b         | 41.90   | 6.16  | 35 | 0.42       | *** |
| Ir56d         | 92.59   | 4.48  | 27 | 0.93       | -   |

**B** 1% HxA

| GAL4          | PER (%) | SE   | n  | normalized | p   |
|---------------|---------|------|----|------------|-----|
| w1118 control | 47.83   | 8.85 | 35 | 1.00       | -   |
| Gr64a         | 50.00   | 8.42 | 22 | 1.05       | -   |
| Gr64c         | 66.67   | 7.97 | 15 | 1.39       | -   |
| Gr64d         | 62.12   | 8.29 | 22 | 1.30       | -   |
| Gr64e         | 24.24   | 6.53 | 33 | 0.51       | -   |
| Gr64f         | 1.63    | 1.63 | 41 | 0.03       | *** |
| Gr5a          | 1.80    | 1.26 | 37 | 0.04       | *** |
| Gr61a         | 0.00    | 0.00 | 14 | 0.00       | *** |
| Gr43a         | 14.81   | 5.55 | 36 | 0.31       | **  |
| Ir56b         | 3.81    | 1.82 | 35 | 0.08       | *** |
| Ir56d         | 11.11   | 4.71 | 27 | 0.23       | **  |
