# Supplementary material for: A subset of sweet-sensing neurons identified by IR56d are necessary and sufficient for fatty acid taste
Source: PubMed Central journal article supplement (PMC5697886; doi:10.1371/journal.pgen.1007059), 2017-11-09

Ir56d>TNT; LexAop-Gal80/+

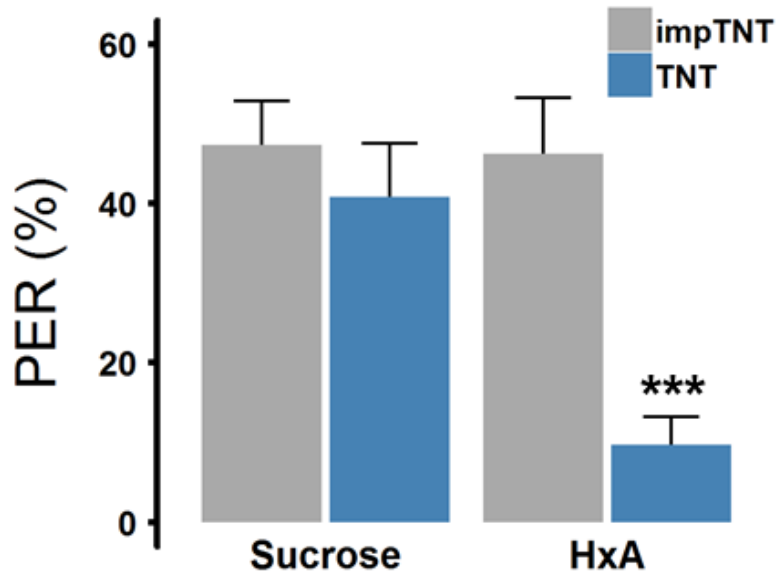

Supplement: pgen.1007059.s002.pdf [file pgen.1007059.s002.pdf]
